# Supplementary material
Source: PubMed Central journal article supplement (PMC8344923)
Supplement: NIHMS1722209-supplement-1.pdf [file NIHMS1722209-supplement-1.pdf]

## Supplemental Table 1

| Time(hrs) | Control | Control SE | 10nM TPA | 10nM TPA SE | 10ng/mL TNF | 10ng/mL TNF SE | 20ng/mL TNF | 20ng/mL TNF SE |
|-----------|---------|------------|----------|-------------|-------------|----------------|-------------|----------------|
| 1         | 1.020   | 0.004      | 0.673    | 0.010       | 1.009       | 0.003          | 1.011       | 0.004          |
| 3         | 1.072   | 0.005      | 0.553    | 0.007       | 1.008       | 0.005          | 0.994       | 0.006          |
| 5         | 1.105   | 0.005      | 0.470    | 0.006       | 0.793       | 0.007          | 0.758       | 0.006          |
| 10        | 1.143   | 0.006      | 0.454    | 0.009       | 0.643       | 0.007          | 0.590       | 0.007          |
| 15        | 1.174   | 0.008      | 0.539    | 0.011       | 0.724       | 0.009          | 0.666       | 0.009          |
| 20        | 1.175   | 0.010      | 0.587    | 0.013       | 0.875       | 0.013          | 0.808       | 0.014          |

**Illustrative TEER values** calculated for control and agonists treatments at 1, 3, 5, 10, 15, and 20 h. Data is for a single 96 well plate experiment, with n= 4 replicate wells for each treatment.

Note P-UAEC are not able to reach 100% confluence at time zero, and so true conditions for TEER do not apply. These values are provided for illustrative purposes only. See text for details.
